1 **MULTI-DIFFERENTIATION POTENTIAL IS NECESSARY FOR OPTIMAL**  
2 **TENOGENESIS OF TENDON STEM CELLS**

3 Ibtesam Rajpar<sup>1</sup>, Jennifer G. Barrett<sup>2</sup>

4 <sup>1</sup>Program in Biomedical and Veterinary Sciences, Marion duPont Scott Equine Medical Center,  
5 Virginia-Maryland College of Veterinary Medicine, Virginia Tech, Leesburg, Virginia, United  
6 States of America

7 <sup>2</sup>Department of Large Animal Clinical Sciences, Marion duPont Scott Equine Medical Center,  
8 Virginia-Maryland College of Veterinary Medicine, Virginia Tech, Leesburg, Virginia, United  
9 States of America

10  
11 **AUTHOR CONTACT INFORMATION**

12 **Ibtesam Rajpar \***

13 17690 Old Waterford Road, Leesburg, VA, 20176

14 irajpar@vt.edu

15 (P) 7037716800

16 **Jennifer G. Barrett**

17 17690 Old Waterford Road, Leesburg, VA, 20176

18 jgbarrett@vt.edu

19 (P) 7037716800

20

21 **\* Corresponding Author**

22

23

24 ABSTRACT

25 **Background**

26 Tendon injury is a significant clinical problem, and regenerative treatments are limited by our  
27 understanding of endogenous tendon stem cells. Recent evidence suggests that tendon stem cells  
28 are diverse in phenotypic character, and may in fact exist on a spectrum of differentiation  
29 capacities. However, the functional significance of each differentiation phenotype is poorly  
30 understood. Toward this end, we performed a comprehensive assessment of differentiation  
31 capacity toward four connective tissue lineages (adipose, bone, cartilage and tendon) with clonal  
32 tendon stem cell lines to: 1) evaluate the differences, if any, in tenogenic potential, and 2)  
33 identify the relationships in differentiation phenotype and proliferation capacity.

34 **Methods**

35 Tendon stem cells were derived from whole equine flexor tendons for this study (N=3). Clonal  
36 tendon stem lines were generated by low-density cell plating, and subjected to standard assays of  
37 tri-lineage differentiation and population doublings. For tenogenesis, a previously engineered  
38 three-dimensional hydrogel construct was incorporated. Differentiation was quantified by the  
39 relative gene expression of lineage-specific markers, and confirmed with lineage-specific cell  
40 staining. Tenogenesis was further analyzed by hydrogel contraction and histomorphometry.

41 Statistical significance was determined using analysis of variance and post-hoc Tukey's tests.

42 **Results**

43 Three distinct tendon stem cell phenotypes were identified, namely differentiation toward: 1)  
44 adipose, bone, cartilage and tendon, 2) bone, cartilage and tendon, or 3) adipose, cartilage and  
45 tendon. Further, a positive correlation was found in the ability to differentiate toward all four  
46 lineages and the generation of a robust, composite tendon-like construct upon tenogenesis,

47 manifested by the strongest expressions of scleraxis and mohawk, and parallel alignment of  
48 tenocyte-like cells with elongated cell morphologies. Significantly increased numbers of  
49 cumulative cell population doublings were seen in the absence of adipogenic potential in clonal  
50 tendon stem cell lines.

## 51 **Conclusions**

52 Our study strengthens reports on the heterogeneous character of tendon stem cells and identifies  
53 key differences in their differentiation and proliferative potentials. Isolation of potent tendon  
54 stem cell populations from tendon stromal fractions may yield improved therapeutic benefits in  
55 clinical models of repair and promote a native, regenerative phenotype in engineered tendons.  
56 Future studies may be targeted to understanding the functional contributions of each tendon stem  
57 cell phenotype *in vivo*, and identifying additional cell phenotypes.

## 59 **KEYWORDS**

60 Mesenchymal stem cell; tendon; tendon stem/progenitor cells; collagen gel; differentiation;  
61 tissue engineering

## 63 **INTRODUCTION**

64 Tendon injuries are debilitating, and significantly impact quality of life. Over 32 million cases of  
65 musculoskeletal injuries involving the tendon are reported every year in the United States, and  
66 the incidence of tendon injuries is increasing[1]. Acute and chronic injuries of the Achilles,  
67 patellar and rotator cuff tendons are most prevalent in the adult population. Acute injuries are  
68 common in athletes, whereas chronic injuries usually arise from tendon overuse or aging[2, 3].  
69 Tendons heal poorly[4], and surgical intervention is often necessary to augment healing.

70 However, the incidence of re-injury following surgical repair can be as high as 20-60% [5]. In  
71 recent times, regenerative therapies, specifically mesenchymal stem cells (MSCs) have shown  
72 promise in the restoration of native tendon structural and functional properties. Among these,  
73 bone marrow MSCs are generally preferred; they are easily accessible, well characterized and  
74 have been efficacious in *in vivo* models [6]. However, bone marrow derived MSCs are also  
75 predisposed to form bone, may not differentiate into tenocytes and may require pre-  
76 transplantation conditioning in bioreactors or with growth factors to facilitate their roles in  
77 tendon repair. This suggests that an alternate MSC source such as tendon may be better suited for  
78 regenerative tendon healing [7].

79 Endogenous tendon stem cells (TSCs) arise from the tendon progenitor niche that is  
80 predominantly a collagen I-rich extracellular matrix [8]. TSCs are the principal mediators of key  
81 processes involved in tendon repair, such as control of the inflammatory response and the  
82 synthesis and remodeling of collagen [9, 10]. Like bone marrow MSCs, TSCs express stem cell  
83 markers, have high proliferative capacity and can differentiate to non-tendon lineages [11] *in*  
84 *vitro*. Recent studies suggest that TSCs from anatomically different regions of tendon such as the  
85 peritenon and the tendon core exhibit differences in their morphologies and tendon healing  
86 potentials [10, 12]. For example, TSCs from the core express higher message levels of scleraxis  
87 and tenomodulin than those from the peritenon, whereas the reverse was shown for the pericyte  
88 marker CD133 [7]. This suggests that more than one phenotype of TSCs may reside in tendon  
89 tissue. However, a comprehensive analysis of TSC lines generated from individual TSC clones is  
90 required to understand the molecular basis of these differences, and their contribution to tendon  
91 healing *in vivo*.

92           The presence of phenotypic variation in TSCs challenges the current paradigm of one  
93 phenotype that encompasses all MSCs, and hence, the criteria proposed by Dominici *et al.* may  
94 not define TSCs[13, 14]. The source of this phenotypic variation is not well understood.  
95 Asymmetrical cell division[15], and culture conditions such as pH, temperature, media additives  
96 and cell culture surface type may contribute to heterogeneity in culture. The study of clonal TSC  
97 lines has improved our understanding of TSC heterogeneity. Bi *et al.* were the first to report tri-,  
98 bi- and unipotential TSCs, or tendon stem/progenitor cells, based on their results from tri-lineage  
99 differentiation of human clonal TSC lines[8]. However, benchtop assays of tri-lineage  
100 differentiation may be poor indicators of tenogenic potential, and it is unknown whether  
101 individual TSCs are differently committed to the tendon fate from each other.

102           Our goal in this study was to determine the proliferative and differentiation potentials of  
103 clonal TSC lines toward four lineages: adipose, bone, cartilage and tendon, to identify TSC  
104 phenotypes based on trilineage differentiation and relate them to proliferative and tenogenic  
105 capacity. In addition to standard population doublings and trilineage differentiation assays, we  
106 incorporated a previously designed tenogenesis assay[16] comprising type I collagen hydrogel  
107 and tenogenic growth factors, to assess the TSC's ability to form their tissue of origin.  
108 Differentiation was quantified by the gene expression analysis of lineage-specific markers, and  
109 tenogenesis was further quantified by gel contraction and histomorphometry. We hypothesized  
110 that TSCs would exhibit heterogeneous differentiation in culture. We further hypothesized that  
111 TSCs that differentiate to four connective tissue lineages would also generate a composite tendon  
112 phenotype upon tenogenesis.

113

114 MATERIALS AND METHODS

## 115 ***Experimental design***

116 TSCs from three juvenile horses (N=3) were included in this study. Each parent TSC line was  
117 analyzed for the gene expression of the stem cell markers CD90, CD105, GNL3 and Oct-4 on  
118 day 0 and at confluence. Thirty clonal TSC lines were generated by plating cells at low density  
119 on culture vessels and expanding in culture for two passages (Fig 1)[17]. Clonal lines were  
120 analyzed for gene expression of the transcription factor Oct-4 in monolayer cultures on day 21.  
121 Cell population doubling assays, trilineage differentiation assays and a tenogenesis assay were  
122 performed on clonal TSC lines. Positive differentiation was determined based on upregulation of  
123 gene expression (gene amplification) of Runx2 for osteogenesis, fatty acid binding protein-4  
124 (FABP4) for adipogenesis, Sox9 and aggrecan for chondrogenesis, and collagen I, III, scleraxis,  
125 mohawk, decorin, biglycan, tenascin C, Axin2 and fibroblast-specific protein-1 (FSP1) for  
126 tenogenesis after cells were grown under differentiation conditions.

127 Clonal TSC lines in this study were categorized based on their differentiation potentials,  
128 which were determined from the results of each lineage-specific differentiation assay. Hence,  
129 each clonal TSC line was designated with a letter for each positive differentiation outcome;  
130 specifically, **A** = **A**dipogenesis positive, **O** = **O**steogenesis positive, **C** = **C**hondrogenesis positive  
131 and **T** = **T**enogenesis positive. Each cell line was grouped with other cell lines exhibiting the  
132 same differentiation potential. Between-group comparisons were performed for statistical  
133 analysis of gene expression, gel contraction, cell alignment and population doublings.

## 134 ***Cell isolation and clonal cell line preparation***

135 Whole digital flexor tendons (N=3) were isolated from horses aged one month (horse 211), 3  
136 months (horse 961) and 12 months (horse 755) with IACUC approval and available on site. After  
137 euthanasia (performed for reasons other than this study), whole tendons were excised, minced

138 and digested with collagenase overnight at 37°C. The next day, tendon digests were strained with  
139 a cell strainer to generate single-cell suspensions, which were centrifuged at 800g for 10 minutes  
140 to obtain cell pellets. Cells were plated into tissue culture dishes at a high density of 6,666  
141 cells/cm<sup>2</sup> to derive parent TSC lines and at a low density of 111 cells/cm<sup>2</sup> to obtain single-cell  
142 derived clonal colonies. All cell lines were cultured in growth media comprising high glucose  
143 DMEM (Thermo Scientific), 10% Collect<sup>TM</sup> Silver fetal bovine serum (MP Biomedicals, Santa  
144 Ana, CA) and 1% penicillin-streptomycin solution (Thermo Scientific). Confluent colonies were  
145 isolated within 10mm cloning cylinders (0.8 x 0.8 cm, Corning, Inc., Corning, NY) [17] and  
146 detached using trypsin-EDTA[18]. Tendon samples from each horse were processed  
147 independently to generate three independent parent tendon stem cell lines and thirty clonal  
148 tendon stem cell lines (10 per horse). For the experiment, clonal colonies were expanded in  
149 culture for two successive passages before plating for differentiation assays and population  
150 doublings. A complete cell culture workflow is illustrated in Fig 1.

### 151 ***Cell proliferation***

152 Ten thousand cells per cell line were plated in individual wells of 24-welled tissue culture dishes  
153 (Nunc<sup>TM</sup>, Thermo Scientific), trypsinized at 70-80% confluence, and counted with an automated  
154 cell counter (Beckman Coulter, Brea, CA). Population doubling numbers (DN) and doubling  
155 time (DT) for each passage, and cumulative doubling numbers (CDN) over 3 successive  
156 passages were calculated using the following formulae:

$$157 \text{ DN} = \log_2(\text{cell number at confluence}/\text{cell number at seed})$$

$$158 \text{ DT (days)} = \text{culture duration} * \log(2) / \log(\text{cell number at confluence}/\text{cell number at seed})$$

$$159 \text{ CDN} = \text{sum of DNs from each passage}$$

### 160 ***Tenogenesis assay***

161 Gels for tenogenesis were generated using a previously published method[16]. One million cells  
162 were suspended in 5 milliliters of tenogenic growth media comprising high glucose DMEM  
163 (Thermo Scientific), 10% Collect<sup>TM</sup> Silver fetal bovine serum (MP Biomedicals), 37.5 µg/ml L-  
164 ascorbic acid (Sigma-Aldrich, St. Louis, MI), 1% penicillin G (Sigma-Aldrich) and 0.8 mg/ml rat  
165 tail collagen I solution (Corning Life Sciences, Tewksbury, MA). Cell/gel suspensions were  
166 plated immediately following preparation in individual wells of 4-welled, rectangular dishes  
167 (Nunc<sup>TM</sup>, 12.8 x 8.6 cm, Thermo Scientific) affixed with two sterile cloning cylinders (0.8 x 0.8  
168 cm, Corning Inc.) set 3 centimeters apart from each other along the longitudinal midline of the  
169 well, and held in place by sterile silicone on day 0. Gels were maintained at 37°C, with 5% CO<sub>2</sub>  
170 and 90% humidity. On day 1, growth media was replaced with media containing 50ng/ml BMP-  
171 12 (recombinant human, Sigma Aldrich) and 10ng/ml IGF-1 (recombinant human, BioVision,  
172 San Francisco, CA). Media was changed on alternate days over a 10-day period.

### 173 *Gel histology and analysis of cell alignment*

174 Longitudinal sections of each gel were fixed in 4% paraformaldehyde overnight at 4°C, washed  
175 in phosphate buffered saline the next day and submitted for histology to a commercial service  
176 (Laudier Histology, New York, NY). Two, 6 micron thick longitudinal slices per sample section  
177 were stained with Masson's trichrome stain, and images were acquired with a microscope  
178 (Olympus Corp, Center Valley, PA) and digital camera (Motic North America, Richmond, BC).  
179 Cell alignment was quantified using ImageJ software analytical tools[19]. Fifty cellular angles  
180 per histological section and two sections/sample were measured relative to the longitudinal gel  
181 axis. Parallel alignment to the longitudinal axis was assigned 0°, and angles of each cell relative  
182 to 0° (0°-90°) were averaged for each sample to draw comparisons between samples.

### 183 *Gel contraction*



184 Digital images of each gel were taken on days 1, 3, 5, 7 and 10 to determine the percentage of  
185 contracted area at each time point relative to the gel area at day 0. Images were analyzed using  
186 ImageJ software analytical tools.

### 187 ***Tri-lineage differentiation***

188 Tri-lineage differentiation potential was assessed using standard benchtop assays of  
189 adipogenesis, osteogenesis and chondrogenesis. For adipogenesis and osteogenesis, cells were  
190 plated at high (21,000 cells/cm<sup>2</sup>) and low densities (4,000 cells/cm<sup>2</sup>) respectively in tissue culture  
191 dishes (Nunc™, Thermo Scientific), and cultured in growth media comprising high-glucose  
192 DMEM and 10% fetal bovine serum (Thermo Scientific). At 70-80% culture confluence, media  
193 was replaced with differentiation media and maintained for 21 days. For chondrogenesis,  
194 200,000 cells per cell line were centrifuged at 800g for 10 minutes to obtain a pellet. Pellet  
195 cultures were maintained in growth media comprising high glucose DMEM and 1% insulin-  
196 transferrin-selenium mix (Gibco™, Thermo Scientific) for 2 days prior to differentiation for 21  
197 days. Differentiation media comprised the following: for adipogenesis, StemPro™ adipogenesis  
198 differentiation medium (Thermo Scientific), for osteogenesis, growth media supplemented with  
199 10mM beta-glycerophosphate, 50µg/ml ascorbate 2-phosphate and 100nM dexamethasone (all  
200 Sigma-Aldrich), and for chondrogenesis, growth media supplemented with 37.5µg/ml ascorbate  
201 2-phosphate, 100nM dexamethasone (both Sigma Aldrich) and 10ng/ml TGF-β3 (recombinant  
202 human, R&D Systems, Minneapolis, MA). On day 21, cultures were either fixed with 10%  
203 formalin (Sigma Aldrich) or frozen for gene expression analysis. Positive results from gene  
204 expression analysis were confirmed with Oil Red O (for adipogenesis) and Alizarin Red S (for  
205 osteogenesis) staining (both Sigma Aldrich), and images were acquired using an inverted  
206 microscope (Olympus Corp, Center Valley, PA).

207 **Gene expression**

208 RNA isolation was performed using the TRIzol™ method (Thermo Scientific). RNA pellets were  
209 subjected to RNeasy® spin columns for removal of genomic DNA contamination (QIAGEN  
210 Inc., Germantown, MD) and purified RNA was quantified using a NanoDrop™ 2000c  
211 spectrophotometer. cDNA was synthesized using a commercial kit (High-Capacity RNA-to-  
212 cDNA kit, Thermo Scientific). Real-time qPCR (7500 Real-Time PCR System, Thermo  
213 Scientific) was performed using custom TaqMan®-MGB probes and primers (Thermo  
214 Scientific) included in Table 1. TaqMan® gene expression assays for equine-specific Runx2  
215 (Assay ID: Ec03469741\_m1), Sox9 (Assay ID: Ec03469763\_s1), Axin2 (Assay ID: APT2CHG)  
216 and FSP-1 (Assay ID: APU643E) were obtained from Thermo Scientific. The comparative  
217 threshold cycle method ( $2^{-\Delta\Delta C_t}$ ) was employed for the relative quantification of gene  
218 expression[20]. Data was normalized to GAPDH. Tenogenic marker expression is reported as  
219 fold change with respect to an equine juvenile tendon reference control. Tri-lineage marker  
220 expression is reported as fold change relative to monolayer controls cultured in growth media on  
221 day 21. Stem cell marker expression is reported as fold-change relative to an adult equine muscle  
222 negative control for parent TSC lines, and relative to day 0 parent TSC lines (monolayer culture)  
223 for clonal TSC lines.

224

225 **Table 1.** Custom designed equine primer and probe sequences

|                   | <b>FORWARD</b>        | <b>REVERSE</b>          | <b>PROBE</b>       |
|-------------------|-----------------------|-------------------------|--------------------|
| <b>GAPDH</b>      | CAAGTCCATGGCACAGTCAAG | GGCCTTCCGTTGATGACAA     | CCGAGCACGGGAAG     |
| <b>Scleraxis</b>  | CGCCCAGCCCAACAG       | TTGCTCAACTTTCTCTGGTTGCT | TCTGCACCTTCTGCC    |
| <b>Collagen I</b> | GCCAAGAAGAAGGCCAAGAA  | TGAGGCCGTCCTGTATGC      | ACATCCCAGCAGTCACCT |

|                     |                          |                          |                      |
|---------------------|--------------------------|--------------------------|----------------------|
| <b>Collagen III</b> | CTGCTTCATCCCCTCTTAT      | ATCCGCATAGGACTGACCA      | AACAGGAAGTTGCTGAAGG  |
| <b>Decorin</b>      | AAGTTGATGCAGCTAGCCTG     | GGCCAGAGAGCCATTGTCA      | ATTTGGCTAAATTGGGACTG |
| <b>Biglycan</b>     | TGGACCTGCAGAACAATGAGAT   | AGAGATGCTGGAGGCCTTTG     | TCTGAGCTCCGAAAGG     |
| <b>FABP4</b>        | AAAATCCCAGAAACCTCACAAAAT | TCACTGGCGACAAGTTTCCA     | TGTGATGCATTTGTAGGCA  |
| <b>Aggrecan</b>     | GACCACTTTACTCTTGCGTTTTG  | GTCAGGGTCTGAAACGTCTACTGA | ACTCTGAGGGTCATCAC    |
| <b>GNL3</b>         | TTCGGGAAGCTGAGCTAAGG     | CTGTCAAGCTTCTGCTGCTGTT   | AACAGCGGCTTGAAG      |
| <b>CD90</b>         | GGCAGACCAGAGCCTTCGT      | ATGGGTGTGGCGGTGGTAT      | TGGACTGCCGCCATG      |
| <b>CD105</b>        | TCCACATCCTCTTCCTGGAGTT   | GGACCTTTGGATAGTCAGCTTCA  | CCAAGGGATGTGTCAGAG   |
| <b>Oct-4</b>        | CAGCTCGGGCTCGAGAAG       | TTCTGGCGACGGTTGCA        | ACGTGGTACGAGTGTGG    |
| <b>Mohawk</b>       | CCCACCAAGACGGAGAAGATACT  | CACCTGCACTAGCGTCATCTG    | TTGGCGCTCGGCTC       |
| <b>Tenascin C</b>   | GTTGGACTCCTGTACCCATTCC   | GGCCCGAGGTCGTGTCT        | TCCAAGCGATGCTG       |

226

## 227 *Statistical analysis*

228 Non-normal data was log transformed prior to analysis. Clonal TSC line differentiation potential  
229 was classified and grouped as described in the experimental design. Group means were  
230 compared to each other using a one-way ANOVA and post hoc Tukey's tests for gene  
231 expression, population doublings (number and time) and cell alignment. Significant differences  
232 in contraction were assessed using a one-way MANOVA with a repeated measures design and  
233 post hoc Tukey's tests. A  $p$ -value of less than 0.05 was considered significant. Computation was  
234 performed in JMP Pro 15 (SAS Institute, Cary, NC) and MS Excel 11 (Microsoft, Redmond,  
235 WA).

236

## 237 RESULTS

### 238 *Clonal TSC lines proliferate in two and three-dimensional culture*

239 All parent TSC lines used in this study expressed the stem cell markers CD90, CD105, GNL3  
240 and Oct-4 in monolayer culture at day 0 and at confluence (Fig 2). Of the thirty clonal colonies

241 isolated and expanded in culture, twenty-six yielded a million cells or more at confluence, and  
242 were seeded in 3D hydrogels for analysis of tenogenic potential. Of these, fifteen clonal TSC  
243 lines were additionally seeded for tri-differentiation assays and cultured in growth media to  
244 assess population doublings. Thirteen out of fifteen clonal TSC lines expressed Oct-4 in  
245 monolayer culture on day 21 (Additional Fig 1). TSCs successfully adhered to tissue culture-  
246 treated plastic, formed 3D pellets for chondrogenesis, and expanded to confluence in successive  
247 monolayer and 3D cultures. Data from fifteen clonal TSC lines was analyzed for comparisons of  
248 differentiation and proliferative potentials, since enough cells could be procured from a single  
249 passage of each of these cell lines to enable four differentiation assays and one assay of  
250 population doublings.

251  
252 ***Three distinct TSC phenotypes can be found in tendon***

253 No unipotent or bipotent clonal TSC lines were obtained in the experiment, as each cell line  
254 differentiated toward three or four tissue types. All of the fifteen clonal TSC lines exhibited both  
255 chondrogenic and tenogenic potential, evident by the positive upregulation of all markers of the  
256 respective lineages upon differentiation. Eight out of fifteen lines differentiated toward adipose,  
257 bone, cartilage, and tendon lineages (quadrpotent AOCT phenotype). Five of fifteen were  
258 positive for osteogenesis, chondrogenesis and tenogenesis (OCT phenotype) but not  
259 adipogenesis, and did not express FABP4 ( $Ct \geq 35$ , no amplification) (Fig 3A). The difference in  
260 FABP4 expression between AOCT and OCT reached significance ( $p = 0.0002$ ) and between  
261 ACT and OCT approached significance ( $p = 0.0599$ ). Two of fifteen were positive for  
262 adipogenesis, chondrogenesis and tenogenesis (ACT phenotype) but did not undergo  
263 osteogenesis, and did not express Runx2 ( $Ct \geq 35$ ) (Fig 3C). Runx2 expression was significantly

264 decreased in the ACT group and compared to the AOCT ( $p = 0.0010$ ) and OCT ( $p = 0.0179$ )  
265 groups. Oil Red O staining confirmed the presence of intracellular oily droplets in adipogenic  
266 cultures of the AOCT and ACT groups (Fig 3B). Likewise, osteogenic differentiation was  
267 confirmed with the formation and staining of calcium nodules and a calcified matrix with  
268 Alizarin Red S in cultures of the AOCT and OCT groups (Fig 3D).

269

270 ***Tissue marker gene expression levels and proliferative capacity of TSCs correlates with the***  
271 ***ACT, OCT and AOCT phenotypes***

272 Gene expression of chondrogenic markers significantly differed among the three phenotypic  
273 groups (Fig 4). Expression of chondrogenic Sox9 was significantly increased in the AOCT group  
274 compared to ACT and OCT ( $p = 0.0167$  and  $0.0017$ ) on day 21 of chondrogenesis, whereas  
275 message levels of aggrecan were the highest in the OCT group, and significantly greater than  
276 AOCT ( $p = 0.029$ ). There were no significant differences in Runx2 expression between the  
277 AOCT and OCT groups (Fig 3C) or in FABP4 expression between the AOCT and ACT groups  
278 (Fig 3A).

279 The OCT group exhibited significantly greater numbers of cumulative population  
280 doublings over three passages compared to the AOCT and ACT groups ( $p = 0.0105$  and  $0.0392$ )  
281 (Fig 5). Population doubling numbers decreased in passages 4 and 5 relative to passage 3 in all  
282 three groups, and this difference reached significance with the AOCT group.

283

284 ***Quadra-differentiation potent TSCs differentiate to express the optimal composite tendon***  
285 ***phenotype***

286 Significant differences were noted in tendon gene expression between the AOCT and OCT  
287 groups (Fig 6). Specifically, scleraxis and mohawk were expressed  $\geq 3$ -fold higher in the AOCT  
288 group compared to the OCT group ( $p = 0.0454$  for scleraxis and  $0.0431$  for mohawk). Expression  
289 of collagen type III was significantly elevated in the OCT group compared to AOCT ( $p =$   
290  $0.0315$ ). In contrast, collagen type I expression remained unaffected by TSC differentiation  
291 phenotype. No between group differences in tenascin C, Axin2 or FSP1 expressions were  
292 observed.

293 All groups contracted collagen matrix in three dimensions albeit to different degrees over  
294 10 days (Fig 7). Significant differences were noted in contracted gel area at two time points  
295 between groups (Fig 7A). Specifically, the ACT group was significantly less contracted than the  
296 AOCT and OCT groups on day 5 ( $p = 0.0004$  and  $0.0008$ ) and day 7 ( $p = 0.0031$  and  $0.0026$ ).

297 All groups exhibited a uniform distribution of TSCs in three dimensions on day 10 (Fig  
298 8). A greater proportion of TSCs ( $>90\%$ ) in all groups were highly aligned to the axis of tension  
299 (Fig 8A), and exhibited elongated cell morphologies. No significant differences in cell alignment  
300 were observed between the three groups (Fig 8B).

301

## 302 DISCUSSION

303 The goal of this study was to determine whether clonal TSC lines obtained from individual TSCs  
304 are diverse in their phenotypic character, and the functional contributions of each phenotype to *in*  
305 *vitro* differentiation and proliferation. Three distinct TSC phenotypes were identified, and the  
306 most significant differences correlated to the presence or lack of adipogenic potential. TSCs of  
307 the AOCT phenotype strongly differentiated to a composite tendon-like construct, most  
308 remarkably by a significant increase in their expression of scleraxis and mohawk. In contrast,

309 TSCs of the OCT phenotype exhibited significantly increased proliferative capacity compared to  
310 the AOCT and ACT groups.

311 This is the first study to investigate the tenogenic potentials of individual TSCs or  
312 multipotent clonal TSC lines from any species. In the absence of tendon-specific markers, we  
313 evaluated a range of markers that collectively identify the tendon phenotype[11, 21]. Significant  
314 increases in message levels of the bHLH transcription factor scleraxis[22] in the AOCT group  
315 can be attributed to tendon neogenesis[23]. Further, scleraxis and mohawk (a member of the  
316 TALE superclass of homeobox genes[24]) are co-expressed in mature, differentiated tendons[25,  
317 26], which may explain their overlapping expression patterns observed in this study. Collagen  
318 type I is the predominant tendon collagen[27], and the ratio of collagen type III protein to type I  
319 protein is a determinant of the pathological state of tendons[28]. The higher collagen type III to  
320 type I ratio message level observed in the OCT group (compared to AOCT), may be suggestive  
321 of disorganized collagenous matrices undergoing active remodeling[28, 29], as opposed to  
322 relatively mature tendons of the AOCT group. The small leucine-rich proteoglycans decorin and  
323 biglycan are functionally similar and likely compensate for each other *in vivo*[30]. However, in  
324 this study, we did not achieve significant differences in their expression patterns.

325 A recent study revealed the presence of a highly proliferative subpopulation of Axin2 and  
326 scleraxis co-expressing TSCs at the site of healing in injured tendons, suggesting this  
327 subpopulation of cells may be the first responders to tendon injury *in vivo*[31]. Our results  
328 suggest that TSCs of the highly proliferative, Axin2-expressing OCT phenotype may represent  
329 this subpopulation. In contrast, scleraxis expression was significantly greater in the AOCT  
330 compared to the OCT group. This result is in support of the hypothesis that Wnt signaling

331 suppresses tenogenic differentiation in TSCs, specifically by downregulating the expression of  
332 scleraxis[32].

333 In response to uniaxial strain along a longitudinal axis, TSCs can contract a disorganized  
334 collagenous matrix to an anisotropic, tendon-like structure with parallel-aligned cells and  
335 collagen fibers[33-36]. Our tenogenesis assay successfully and consistently generated tendon-  
336 like constructs with aligned cells of elongated morphologies on day 10 of culture. The reduced  
337 contraction of the ACT group in this study suggests that downregulation of Runx2 expression in  
338 TSCs may impede tendon repair *in vivo*. One study suggests that overexpression of Runx2 may  
339 augment tendon-to-bone healing, by inducing site-specific rather than heterotopic bone  
340 formation[37].

341 Expansion of single-cell derived colonies is notoriously difficult *in vitro*, and limited this  
342 study to fifteen clonal TSC lines. Feeder layers, growth factors or alternative methods to  
343 supplement cell growth were not used in this study to avoid potential interference with study  
344 outcomes. However, sufficient cell numbers were acquired from fifteen TSCs to enable gene  
345 expression analysis as a superior outcome of differentiation as opposed to conventional stain  
346 absorbance and microscopy. In contrast to a previous study on trilineage differentiation of TSCs  
347 [8], we did not identify clones with solely adipogenic, osteogenic or chondrogenic potential. This  
348 may be attributed to species-related differences, or the requirement of highly proliferative clones  
349 to simultaneously assess trilineage, tenogenic and proliferative capacities.

350 Surprisingly, the group with the highest differentiation capacity, AOCT, did not have the  
351 highest proliferation capacity in our study. The AOCT group exhibited significantly lower  
352 numbers of cumulative cell doublings compared to the OCT group. This observation is in  
353 contrast to the proposed model of hierarchical loss of potential in bone marrow MSCs, wherein



354 multi-differentiation and proliferative potential are positively correlated[38, 39]. In this model,  
355 adipogenic potential is reduced with successive population doublings[40]. In tendon, we propose  
356 that lack of adipogenic potential may signify 1) increase in proliferative potential, and 2)  
357 decrease of tendon-related gene expression upon tenogenesis as observed in TSCs of the OCT  
358 phenotype. Further, it is also possible that in contrast to proposed models of lineage  
359 commitment, distinct TSC phenotypes identified in this study represent independent tendon cell  
360 populations rather than ones derived from a common ancestor. Future investigation is warranted  
361 to further understand the relationships in TSC characteristics and the molecular mechanisms  
362 underlying loss or gain of potential *in vitro*.

## 364 CONCLUSIONS

365 Of the three TSC phenotypes identified in this study, TSCs of the AOCT phenotype had optimal  
366 tenogenic capacity, evident by the strongest expression of scleraxis and mohawk, progressive  
367 contraction over 10 days and elongated cell morphologies in histologic sections of tendon  
368 constructs. In contrast, TSCs of the OCT phenotype may exhibit reduced osteogenesis, and thus  
369 offer select advantages in tendon healing such as a reduced proclivity to ectopic bone formation.  
370 Future studies may be targeted to the identification of additional TSC phenotypes, and the  
371 contributions of each phenotype to functional tendon repair *in vivo*.

## 373 DECLARATIONS

### 374 ***Ethics approval and consent to participate***

375 Animal subjects used in this study were euthanized for reasons other than stated in this study,  
376 and with Virginia Tech's Institutional Animal Care and Use Committee approval.

377 ***Consent for publication***

378 Not applicable

379 ***Availability of data and materials***

380 All data generated and analyzed during this study are included with this submitted article  
381 (and its supplementary information files).

382 ***Competing interests***

383 The authors declare that they do not have any competing interests.

384 ***Funding***

385 This study was funded in part by Virginia-Maryland Regional College of Veterinary Medicine's  
386 Internal Research Competition grant award.

387 ***Author contributions***

388 IR and JGB designed the study. IR performed the experiments, analyzed the data and wrote the  
389 manuscript. Both authors edited the manuscript and approved the final submitted version.

390 ***Acknowledgements***

391 The authors would like to acknowledge Andrew Hogan for his support with cell culture.

392

393 **LIST OF ABBREVIATIONS**

394 1) TSC: tendon stem cell

395 2) MSC: mesenchymal stem cell

396 3) FABP4: fatty acid binding protein-4

397 4) FSP-1: fibroblast specific protein-1

398 5) DN: doubling number

399 6) DT: doubling time

400 7) CDN: cumulative doubling number

401 8) 3D: three-dimensional

402 9) Oct-4: Octamer-4

403

#### 404 REFERENCES

- 405 1. Butler DL, Juncosa-Melvin N, Boivin GP, Galloway MT, Shearn JT, Gooch C, et al.  
406 Functional tissue engineering for tendon repair: A multidisciplinary strategy using mesenchymal  
407 stem cells, bioscaffolds, and mechanical stimulation. *J Orthop Res.* 2008;26(1):1-9.
- 408 2. Jarvinen TA, Kannus P, Paavola M, Jarvinen TL, Jozsa L, Jarvinen M. Achilles tendon  
409 injuries. *Curr Opin Rheumatol.* 2001;13(2):150-5.
- 410 3. Itoi E. Rotator cuff tear: physical examination and conservative treatment. *J Orthop Sci.*  
411 2013;18(2):197-204.
- 412 4. Tang JB, Wu YF, Cao Y, Chen CH, Zhou YL, Avanesian B, et al. Basic FGF or VEGF  
413 gene therapy corrects insufficiency in the intrinsic healing capacity of tendons. *Sci Rep.*  
414 2016;6:20643.
- 415 5. Akyol E, Hindocha S, Khan WS. Use of stem cells and growth factors in rotator cuff  
416 tendon repair. *Curr Stem Cell Res Ther.* 2015;10(1):5-10.
- 417 6. Godwin EE, Young NJ, Dudhia J, Beamish IC, Smith RK. Implantation of bone marrow-  
418 derived mesenchymal stem cells demonstrates improved outcome in horses with overstrain  
419 injury of the superficial digital flexor tendon. *Equine Vet J.* 2012;44(1):25-32.
- 420 7. Mienaltowski MJ, Adams SM, Birk DE. Regional differences in stem cell/progenitor cell  
421 populations from the mouse achilles tendon. *Tissue Eng Part A.* 2013;19(1-2):199-210.

- 422 8. Bi Y, Ehrchiou D, Kilts TM, Inkson CA, Embree MC, Sonoyama W, et al. Identification  
423 of tendon stem/progenitor cells and the role of the extracellular matrix in their niche. *Nat Med.*  
424 2007;13(10):1219-27.
- 425 9. Kader D, Saxena A, Movin T, Maffulli N. Achilles tendinopathy: some aspects of basic  
426 science and clinical management. *Br J Sports Med.* 2002;36(4):239-49.
- 427 10. Clegg PD, Strassburg S, Smith RK. Cell phenotypic variation in normal and damaged  
428 tendons. *Int J Exp Pathol.* 2007;88(4):227-35.
- 429 11. Lui PP. Identity of tendon stem cells--how much do we know? *J Cell Mol Med.*  
430 2013;17(1):55-64.
- 431 12. Cadby JA, Buehler E, Godbout C, van Weeren PR, Snedeker JG. Differences between the  
432 cell populations from the peritenon and the tendon core with regard to their potential implication  
433 in tendon repair. *PLoS One.* 2014;9(3):e92474.
- 434 13. Dominici M, Le Blanc K, Mueller I, Slaper-Cortenbach I, Marini F, Krause D, et al.  
435 Minimal criteria for defining multipotent mesenchymal stromal cells. The International Society  
436 for Cellular Therapy position statement. *Cytotherapy.* 2006;8(4):315-7.
- 437 14. Whitfield MJ, Lee WC, Van Vliet KJ. Onset of heterogeneity in culture-expanded bone  
438 marrow stromal cells. *Stem Cell Res.* 2013;11(3):1365-77.
- 439 15. Knoblich JA. Mechanisms of asymmetric stem cell division. *Cell.* 2008;132(4):583-97.
- 440 16. Rajpar I, Barrett JG. Optimizing growth factor induction of tenogenesis in three-  
441 dimensional culture of mesenchymal stem cells. *J Tissue Eng.* 2019;10:2041731419848776.
- 442 17. Mathupala S, Sloan AA. An agarose-based cloning-ring anchoring method for isolation  
443 of viable cell clones. *Biotechniques.* 2009;46(4):305-7.

- 444 18. Sworder BJ, Yoshizawa S, Mishra PJ, Cherman N, Kuznetsov SA, Merlino G, et al.  
445 Molecular profile of clonal strains of human skeletal stem/progenitor cells with different  
446 potencies. *Stem Cell Res.* 2015;14(3):297-306.
- 447 19. Liu ZQ. Scale space approach to directional analysis of images. *Appl Opt.*  
448 1991;30(11):1369-73.
- 449 20. Livak KJ, Schmittgen TD. Analysis of relative gene expression data using real-time  
450 quantitative PCR and the 2(-Delta Delta C(T)) Method. *Methods.* 2001;25(4):402-8.
- 451 21. Lui PP. Markers for the identification of tendon-derived stem cells in vitro and tendon  
452 stem cells in situ - update and future development. *Stem Cell Res Ther.* 2015;6:106.
- 453 22. Schweitzer R, Chyung JH, Murtaugh LC, Brent AE, Rosen V, Olson EN, et al. Analysis  
454 of the tendon cell fate using Scleraxis, a specific marker for tendons and ligaments.  
455 *Development.* 2001;128(19):3855-66.
- 456 23. Bagchi RA, Czubryt MP. Scleraxis: A New Regulator of Extracellular Matrix Formation.  
457 *Genes and Cardiovascular Function.* Boston, MA: Springer; 2011. p. 57-65.
- 458 24. Liu H, Zhang C, Zhu S, Lu P, Zhu T, Gong X, et al. Mohawk promotes the tenogenesis  
459 of mesenchymal stem cells through activation of the TGFbeta signaling pathway. *Stem Cells.*  
460 2015;33(2):443-55.
- 461 25. Brent AE, Schweitzer R, Tabin CJ. A somitic compartment of tendon progenitors. *Cell.*  
462 2003;113(2):235-48.
- 463 26. Ito Y, Toriuchi N, Yoshitaka T, Ueno-Kudoh H, Sato T, Yokoyama S, et al. The Mohawk  
464 homeobox gene is a critical regulator of tendon differentiation. *Proc Natl Acad Sci U S A.*  
465 2010;107(23):10538-42.

- 466 27. Kannus P. Structure of the tendon connective tissue. *Scand J Med Sci Sports*.  
467 2000;10(6):312-20.
- 468 28. Pingel J, Lu Y, Starborg T, Fredberg U, Langberg H, Nedergaard A, et al. 3-D  
469 ultrastructure and collagen composition of healthy and overloaded human tendon: evidence of  
470 tenocyte and matrix buckling. *J Anat*. 2014;224(5):548-55.
- 471 29. Lui PP, Chan LS, Lee YW, Fu SC, Chan KM. Sustained expression of proteoglycans and  
472 collagen type III/type I ratio in a calcified tendinopathy model. *Rheumatology (Oxford)*.  
473 2010;49(2):231-9.
- 474 30. Zhang G, Ezura Y, Chervoneva I, Robinson PS, Beason DP, Carine ET, et al. Decorin  
475 regulates assembly of collagen fibrils and acquisition of biomechanical properties during tendon  
476 development. *J Cell Biochem*. 2006;98(6):1436-49.
- 477 31. Greinstein M MD, Rajagopal J, Galloway JL. Identification of a latent resident progenitor  
478 population in the adult mouse tendon. Orthopaedic Research Society Annual Meeting; Austin,  
479 TX2019.
- 480 32. Kishimoto Y, Ohkawara B, Sakai T, Ito M, Masuda A, Ishiguro N, et al. Wnt/beta-  
481 catenin signaling suppresses expressions of Scx, Mxk, and Tnmd in tendon-derived cells. *PLoS*  
482 *One*. 2017;12(7):e0182051.
- 483 33. Kuo CK, Tuan RS. Mechanoactive tenogenic differentiation of human mesenchymal  
484 stem cells. *Tissue Eng Part A*. 2008;14(10):1615-27.
- 485 34. Chen MY, Jeng L, Sun YL, Zhao CF, Zobitz ME, Moran SL, et al. Contraction of  
486 collagen gels seeded with tendon cells. *Biorheology*. 2006;43(3,4):337-45.
- 487 35. Torres DS, Freyman TM, Yannas IV, Spector M. Tendon cell contraction of collagen-  
488 GAG matrices in vitro: effect of cross-linking. *Biomaterials*. 2000;21(15):1607-19.

- 489 36. Buckley MR, Sarver JJ, Freedman BR, Soslowsky LJ. The dynamics of collagen  
490 uncrimping and lateral contraction in tendon and the effect of ionic concentration. *J Biomech.*  
491 2013;46(13):2242-9.
- 492 37. Zhang X, Yang M, Lin L, Chen P, Ma KT, Zhou CY, et al. Runx2 overexpression  
493 enhances osteoblastic differentiation and mineralization in adipose--derived stem cells in vitro  
494 and in vivo. *Calcif Tissue Int.* 2006;79(3):169-78.
- 495 38. Russell KC, Phinney DG, Lacey MR, Barrilleaux BL, Meyertholen KE, O'Connor KC. In  
496 vitro high-capacity assay to quantify the clonal heterogeneity in trilineage potential of  
497 mesenchymal stem cells reveals a complex hierarchy of lineage commitment. *Stem Cells.*  
498 2010;28(4):788-98.
- 499 39. Muraglia A, Cancedda R, Quarto R. Clonal mesenchymal progenitors from human bone  
500 marrow differentiate in vitro according to a hierarchical model. *J Cell Sci.* 2000;113 ( Pt  
501 7):1161-6.
- 502 40. Russell KC, Lacey MR, Gilliam JK, Tucker HA, Phinney DG, O'Connor KC. Clonal  
503 analysis of the proliferation potential of human bone marrow mesenchymal stem cells as a  
504 function of potency. *Biotechnol Bioeng.* 2011;108(11):2716-26.

505

#### 506 ADDITIONAL FILE INFORMATION

507 **File name:** Additional Fig. 1

508 **File format:** .pdf (Additional Fig. 1.pdf)

509 **Title:** Gene expression of the transcription factor Oct-4 in clonal TSC lines.

510

#### 511 FIGURE LEGENDS

512 **Fig 1.** Cell culture workflow

513 **Fig 2.** Gene expression of stem cell markers in parent TSC lines: 211, 755 and 961 are individual  
514 subject identifiers. CD90 and CD105 are cell surface proteins, GNL3 is a nuclear protein and  
515 Oct-4 is a transcription factor.

516 **Fig 3.** Adipogenesis assay (A, B) and osteogenesis assay (C, D) results. Gene expression of  
517 FABP4 relative to undifferentiated monolayer cells on day 21 (A), visualization of oily droplets  
518 in representative **AOCT** and **ACT** cultures by Oil Red O staining (B), gene expression of Runx2  
519 relative to undifferentiated monolayer cells on day 21 (C) and visualization of calcium nodules  
520 and calcified matrices in representative **AOCT** and **OCT** cultures by Alizarin Red S staining (D).  
521 Lines and asterisk indicate groups with significant differences in them. Images are at a 10X  
522 magnification. **A** = Adipogenesis positive, **O** = Osteogenesis positive, **C** = Chondrogenesis  
523 positive and **T** = Tenogenesis positive.

524 **Fig 4.** Chondrogenesis assay results. Gene expression of Sox9 and aggrecan relative to  
525 uninduced monolayer cells on day 21. Lines and asterisk indicate groups with significant  
526 differences in them.

527 **Fig 5.** Population doubling assay results. Cumulative clonal tendon stem cell lines' doubling  
528 numbers (top), number of doublings (bottom left) and doubling time (bottom right) over 3  
529 successive passages. Lines and asterisks indicate groups with significant differences.

530 **Fig 6.** Tenogenesis assay results. Gene expression of tendon-related genes relative to equine  
531 juvenile tendon on day 10. Lines and asterisks indicate groups with significant differences.

532 **Fig 7.** Percentage contracted gel area relative to day 0 gel area at different time points over 10  
533 days of culture (A), and digital images of constructs at harvest (B). The ACT group had



534 contracted the least at culture endpoint. Asterisks indicate groups with significant between-group  
535 differences in contraction at time point. Scale bar on images represents 0.5 centimeters.

536 **Fig 8.** Masson's trichrome staining of 6 micron thick histological sections of representative  
537 constructs (A), and average cellular angle of deviation from the longitudinal axis (B). For cell  
538 alignment, an angle of 0° demarcates perfect parallel alignment. Scale bar on images represents  
539 250 microns.

540

541

542

WITHDRAWN  
see manuscript DOI for details

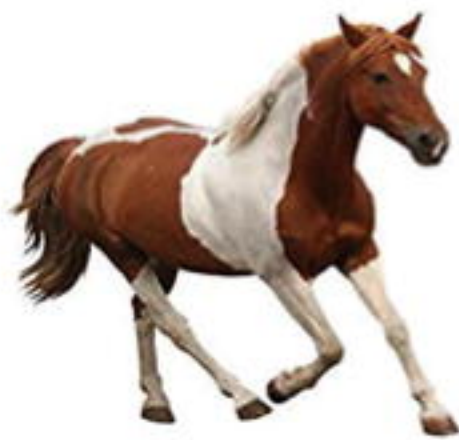

Excise whole digital flexor tendons

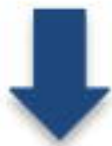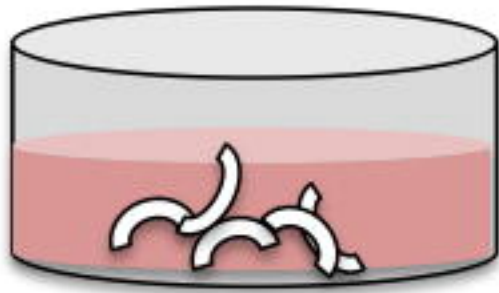

Digest tendon pieces with collagenase, overnight at 37°C

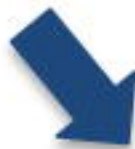

Plate tendon cells at high density to get a mixed cell population (parent TSC line)

bioRxiv preprint doi: <https://doi.org/10.1101/845974>; this version posted November 17, 2019. The copyright holder for this preprint (which was not certified by peer review) is the author/funder. All rights reserved. No reuse allowed without permission.

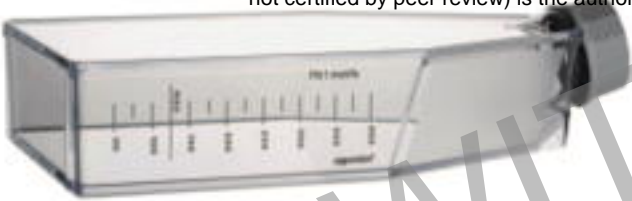

Strain tendon digests and centrifuge at 800g for 10 minutes to get cell pellets

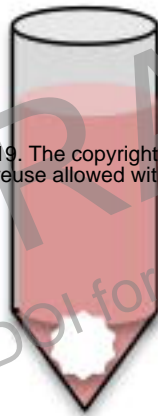

Isolate confluent colony with trypsin and cloning cylinder

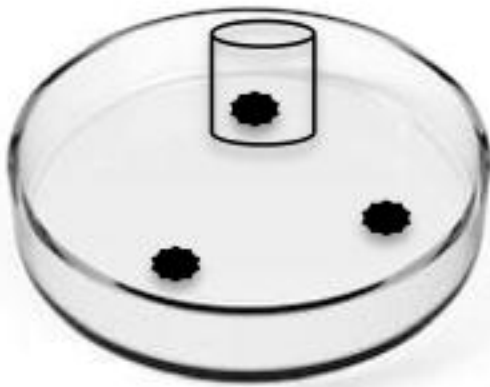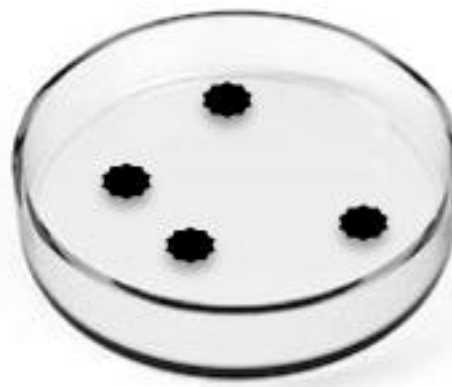

Plate tendon cells at low density to get single-cell derived colonies

Expand colony for two passages

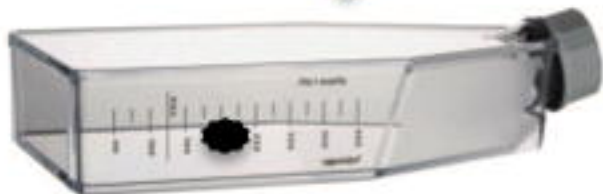

Trypsinize confluent culture and centrifuge at 800g for 10 minutes to get cell pellets

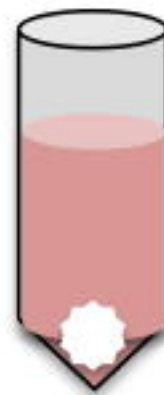

Plate cells for assays (P3)

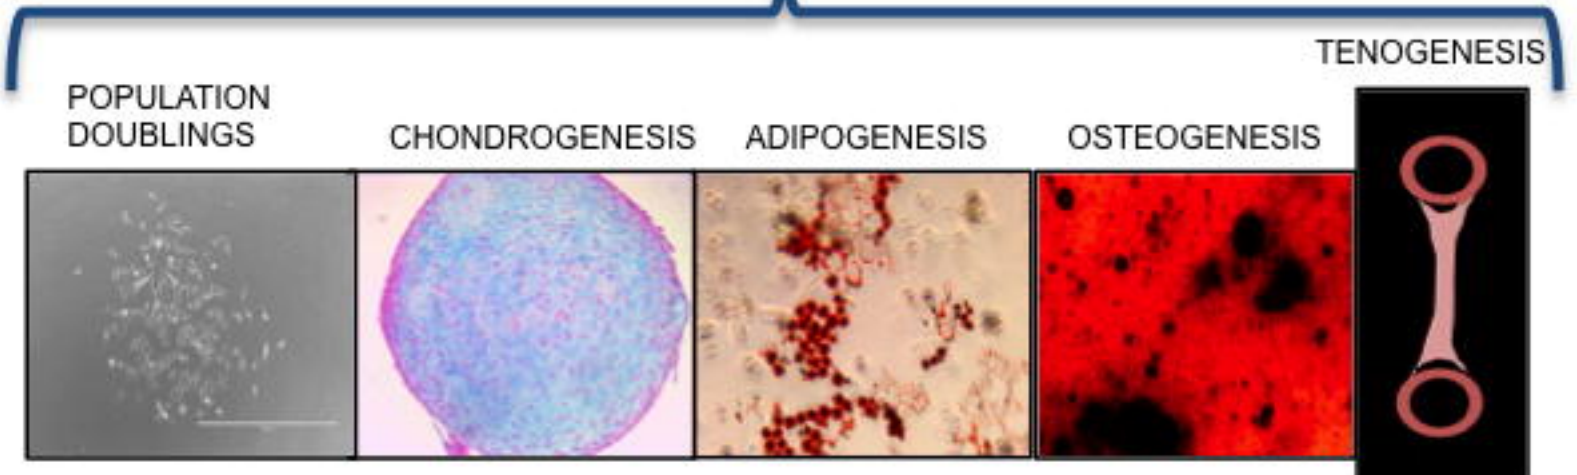

# EXPRESSION OF STEM CELL MARKERS IN PARENT TSC LINES

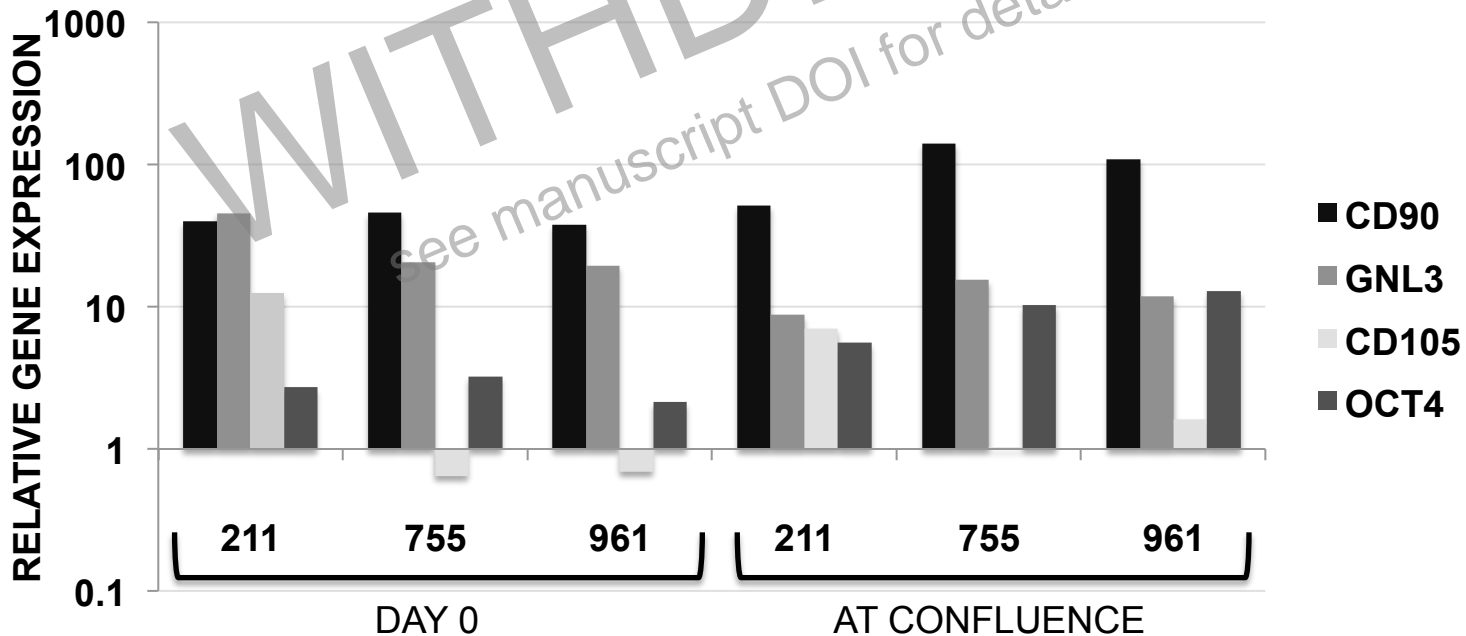

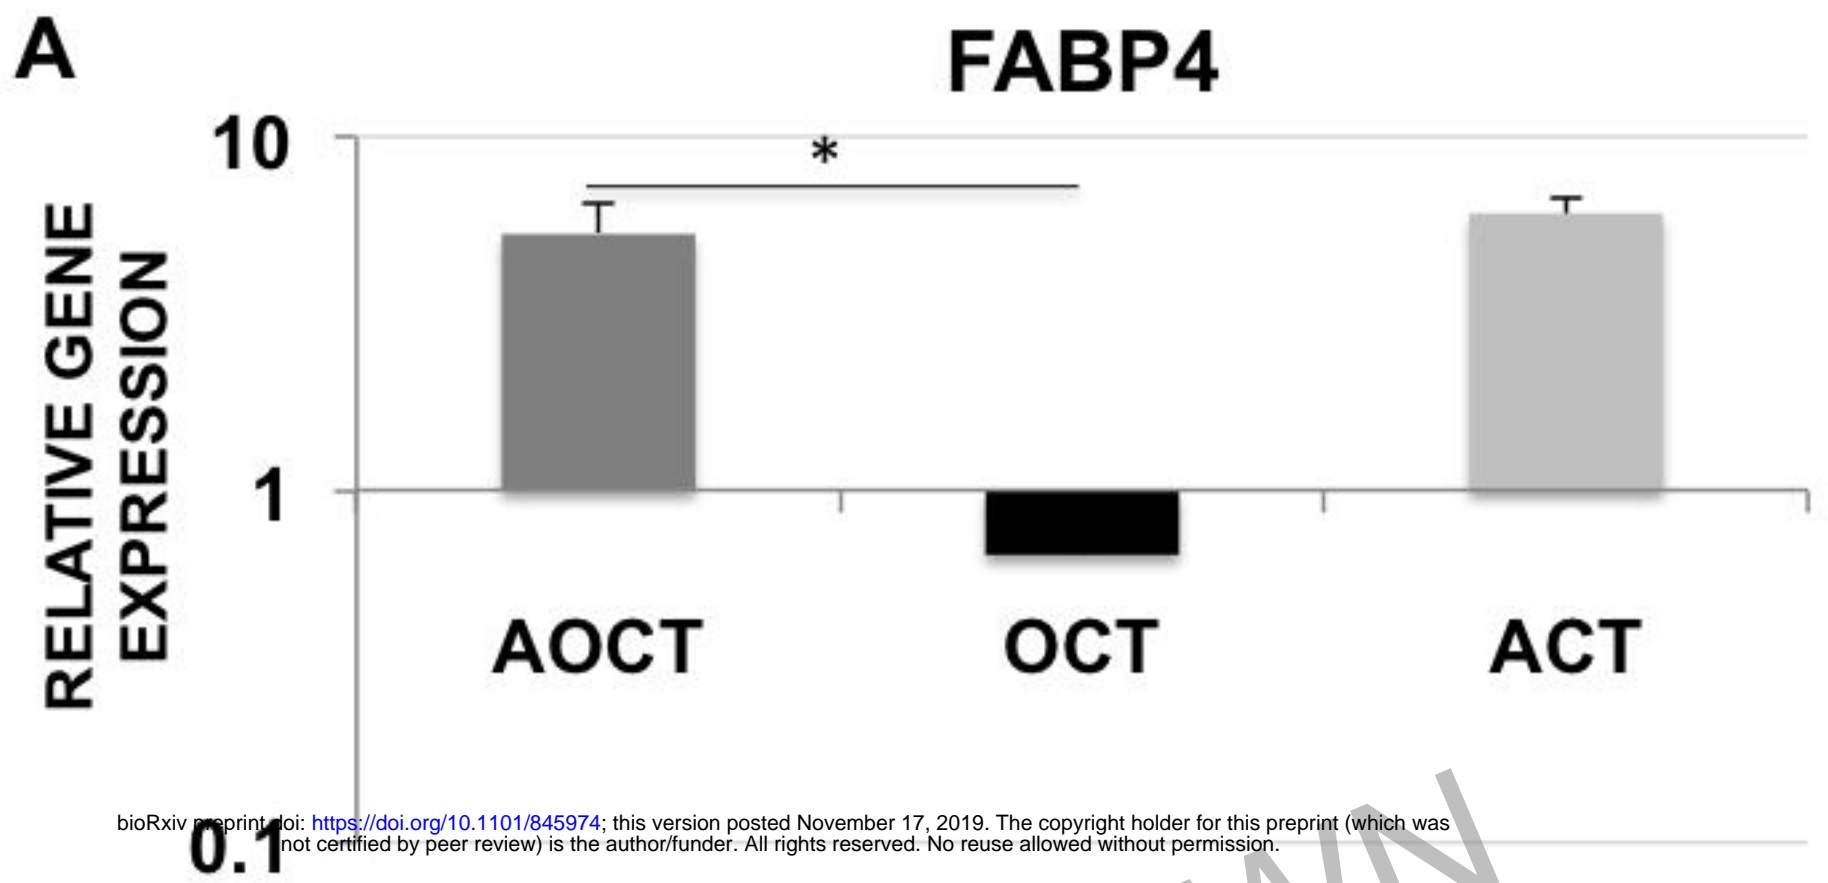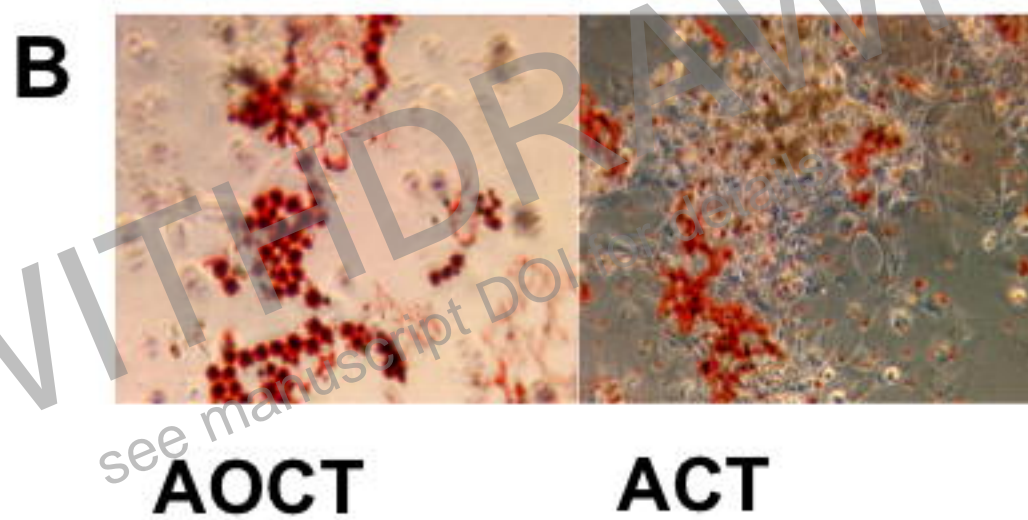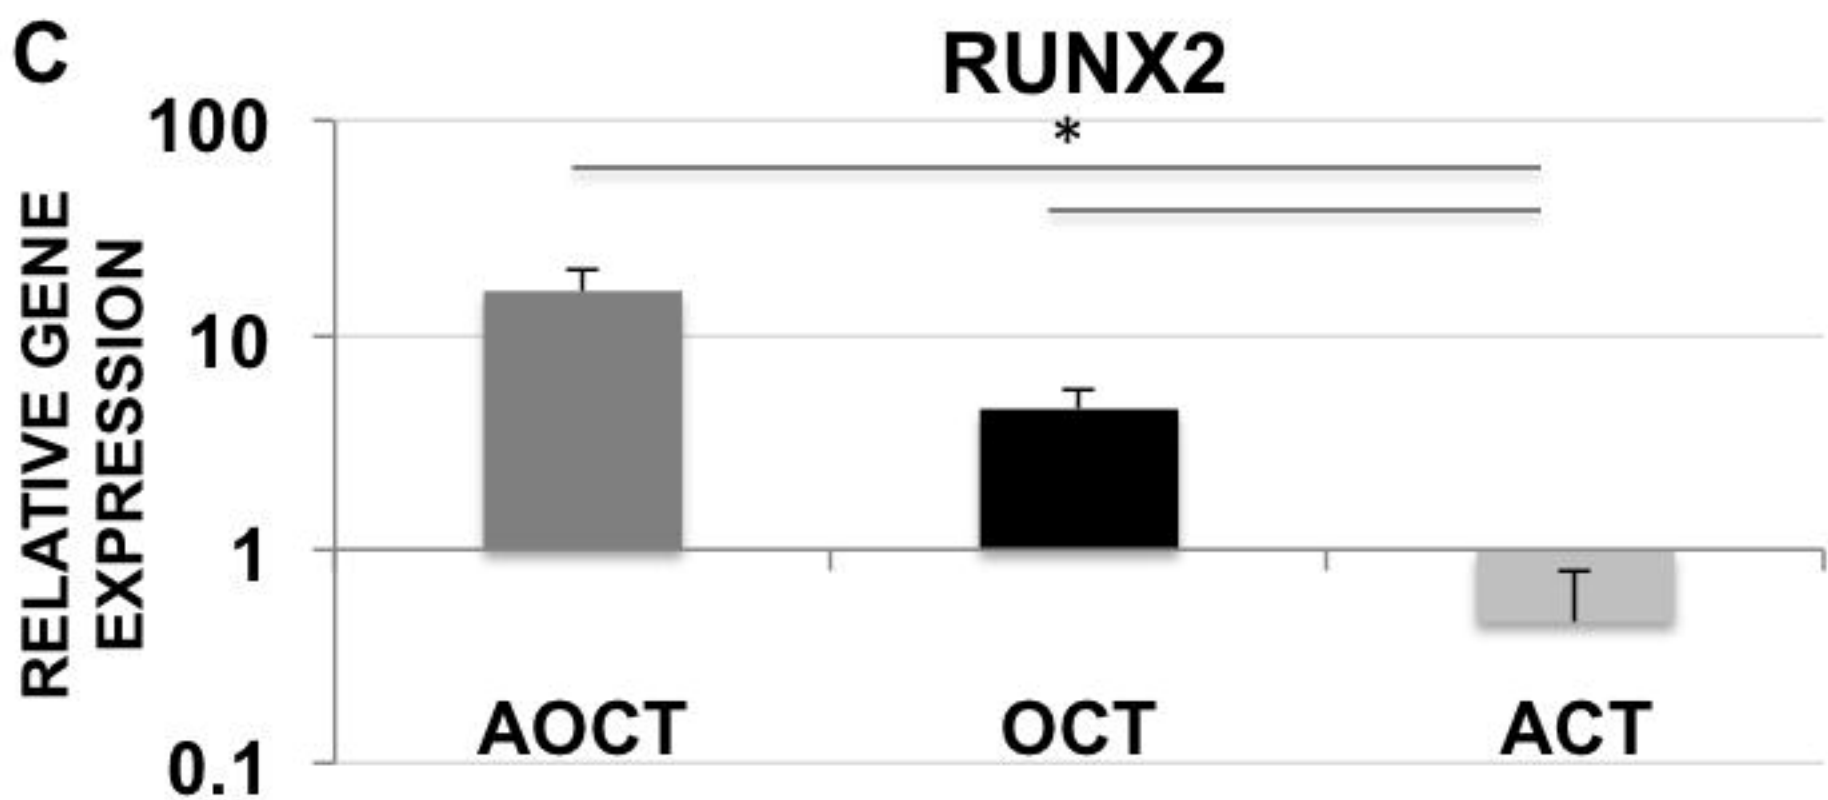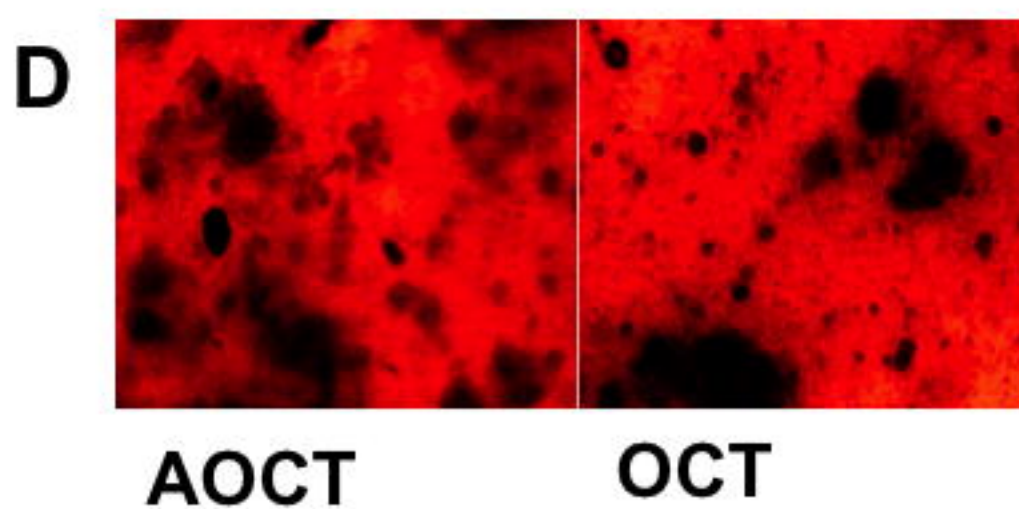

# CHONDROGENESIS

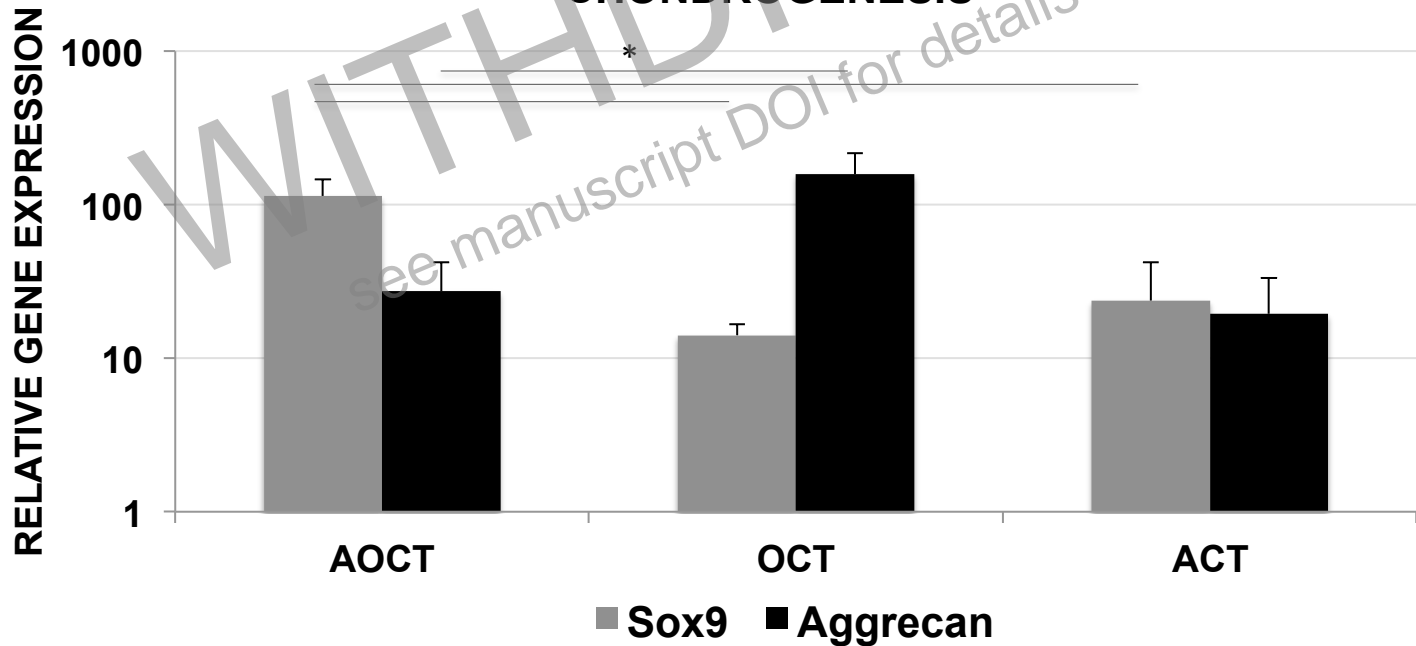

# CUMULATIVE NUMBER OF DOUBLINGS

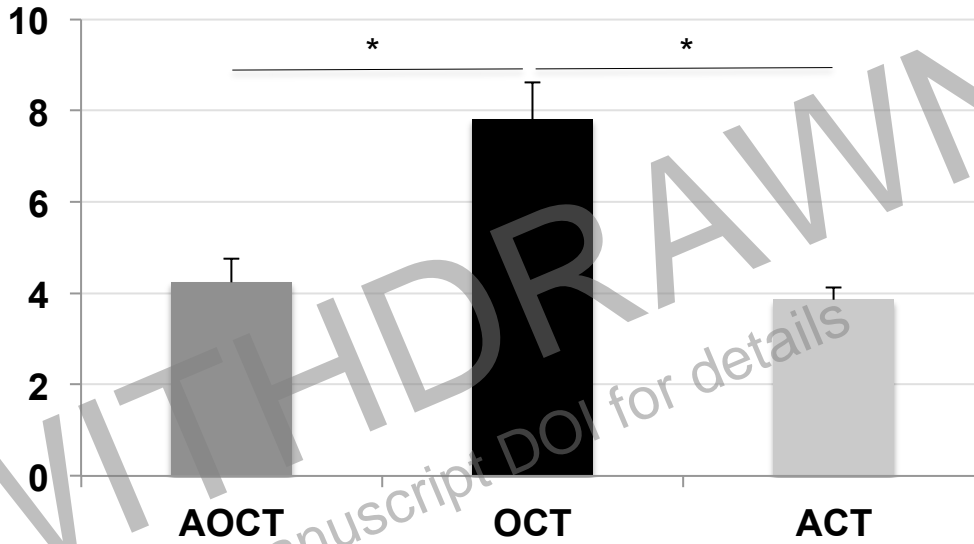

## NUMBER OF DOUBLINGS

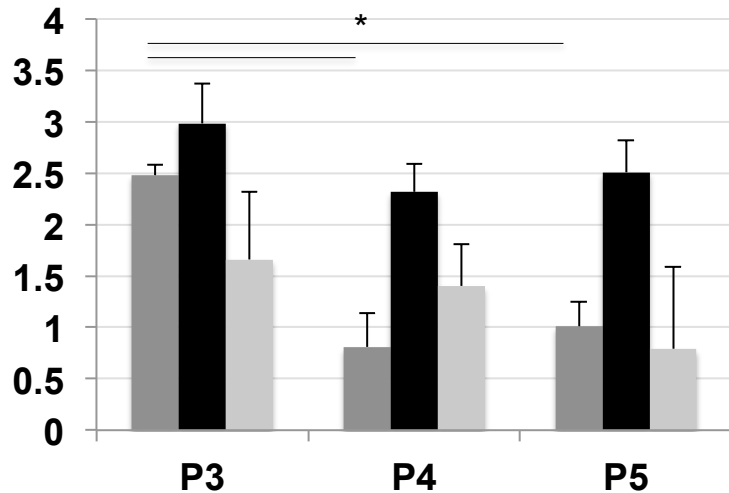

■ AOCT ■ OCT ■ ACT

## DOUBLING TIME (DAYS)

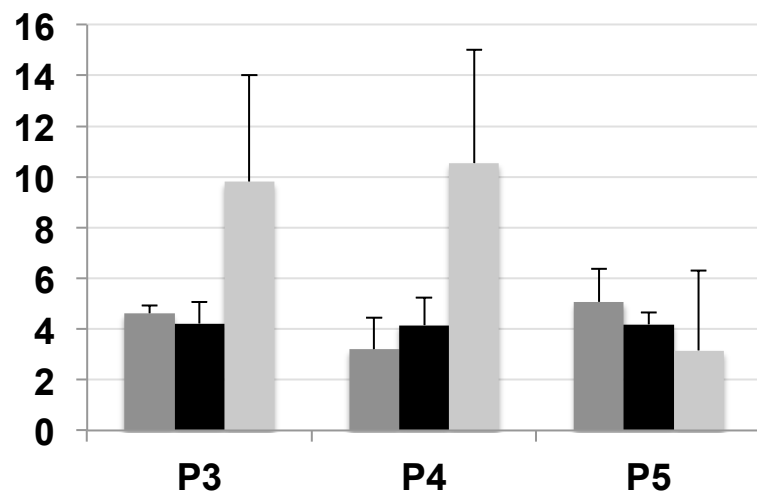

■ AOCT ■ OCT ■ ACT

### SCLERAXIS

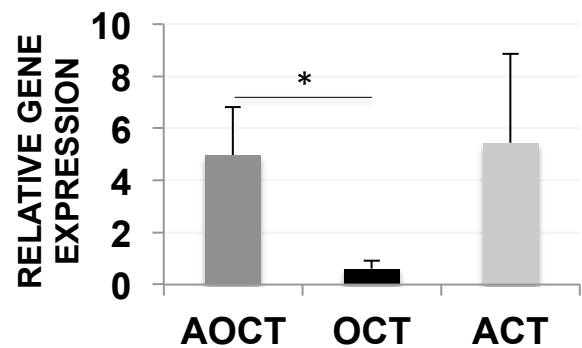

### COLLAGEN I

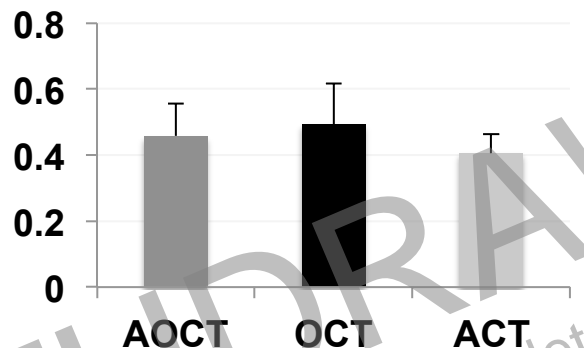

### DECORIN

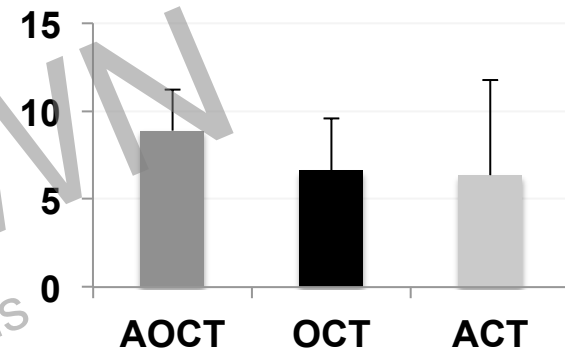

### MOHAWK

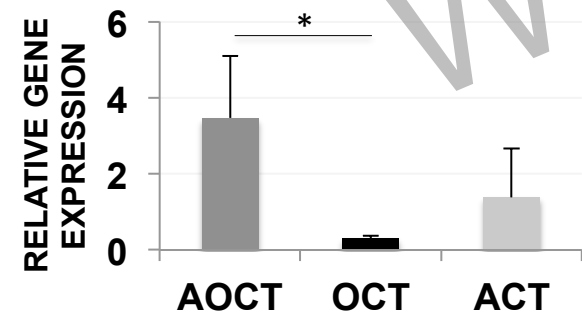

### COLLAGEN III

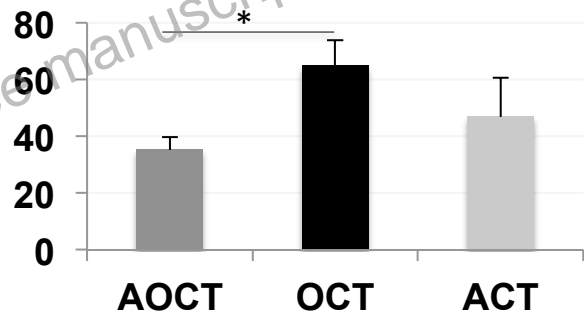

### BIGLYCAN

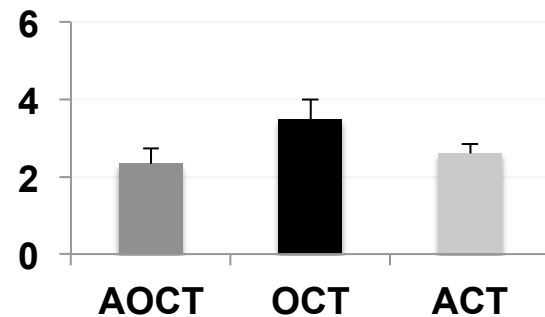

### AXIN2

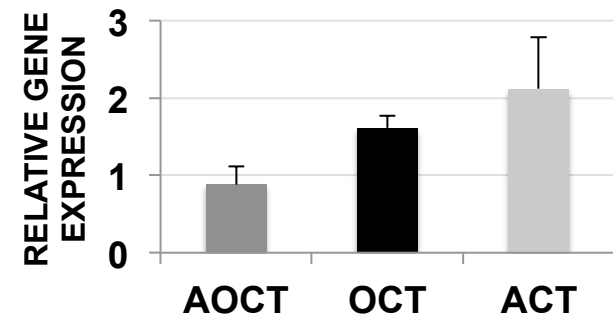

### FSP1

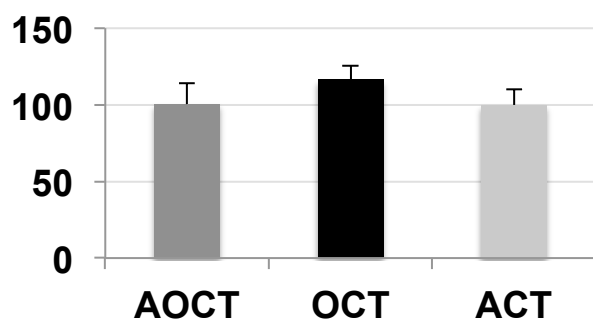

### TENASCIN C

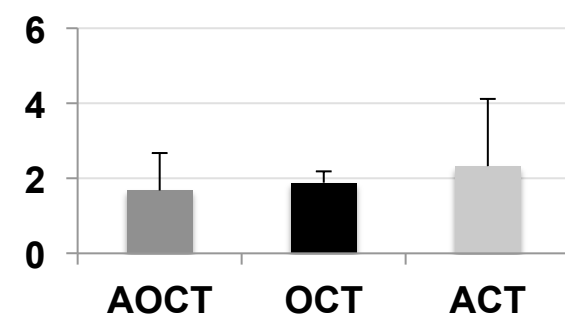

**A**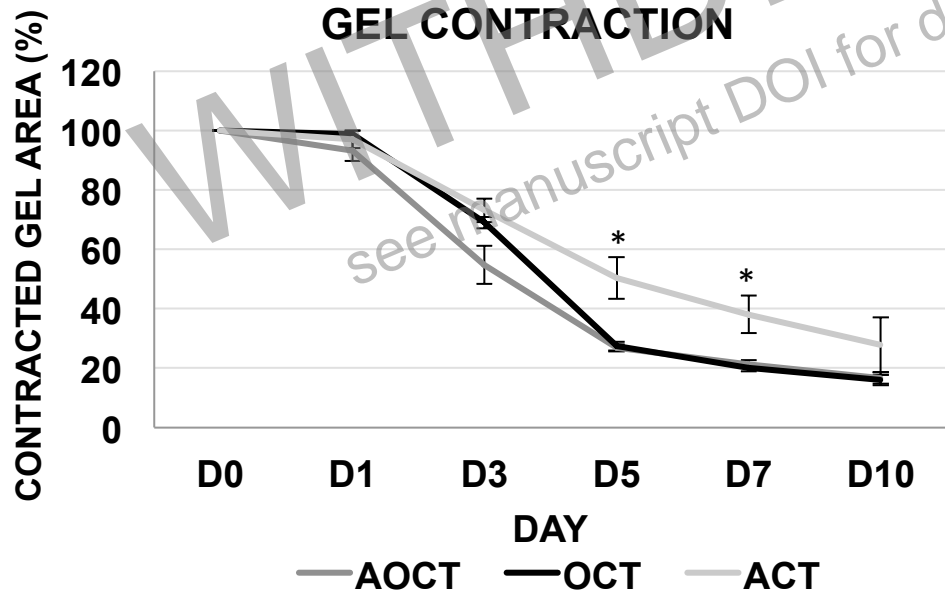**B**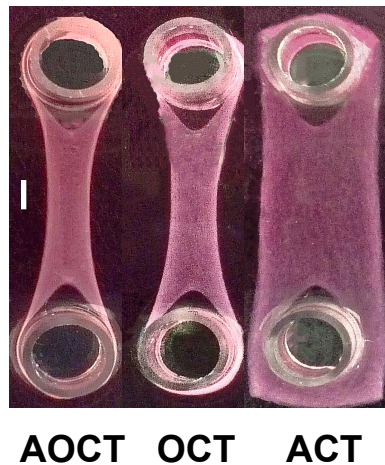



**A**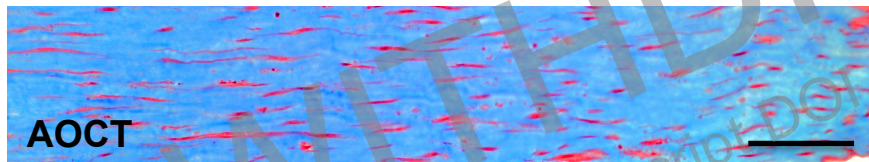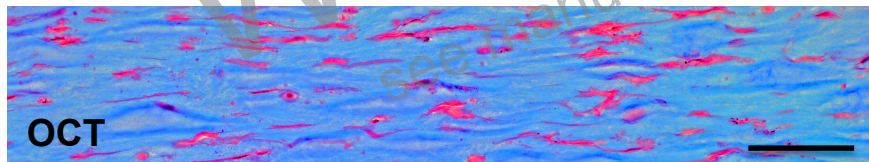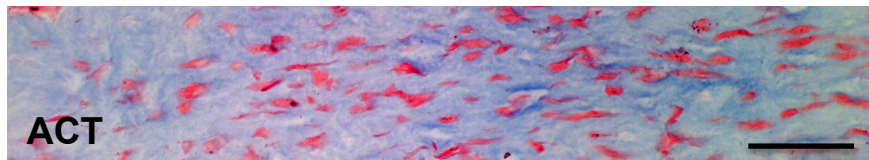**B**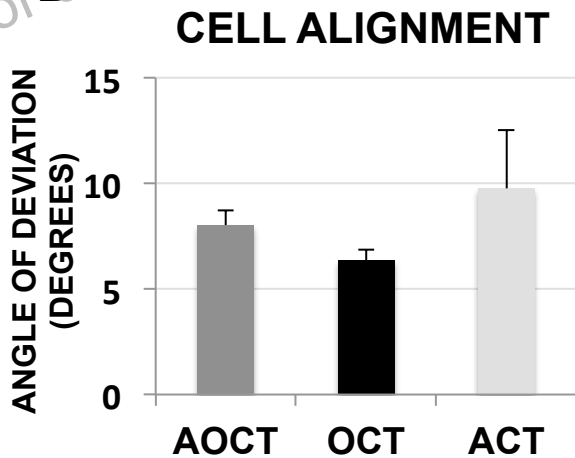

**RELATIVE GENE EXPRESSION**

**EXPRESSION OF OCT4 IN CLONAL TSC LINES**

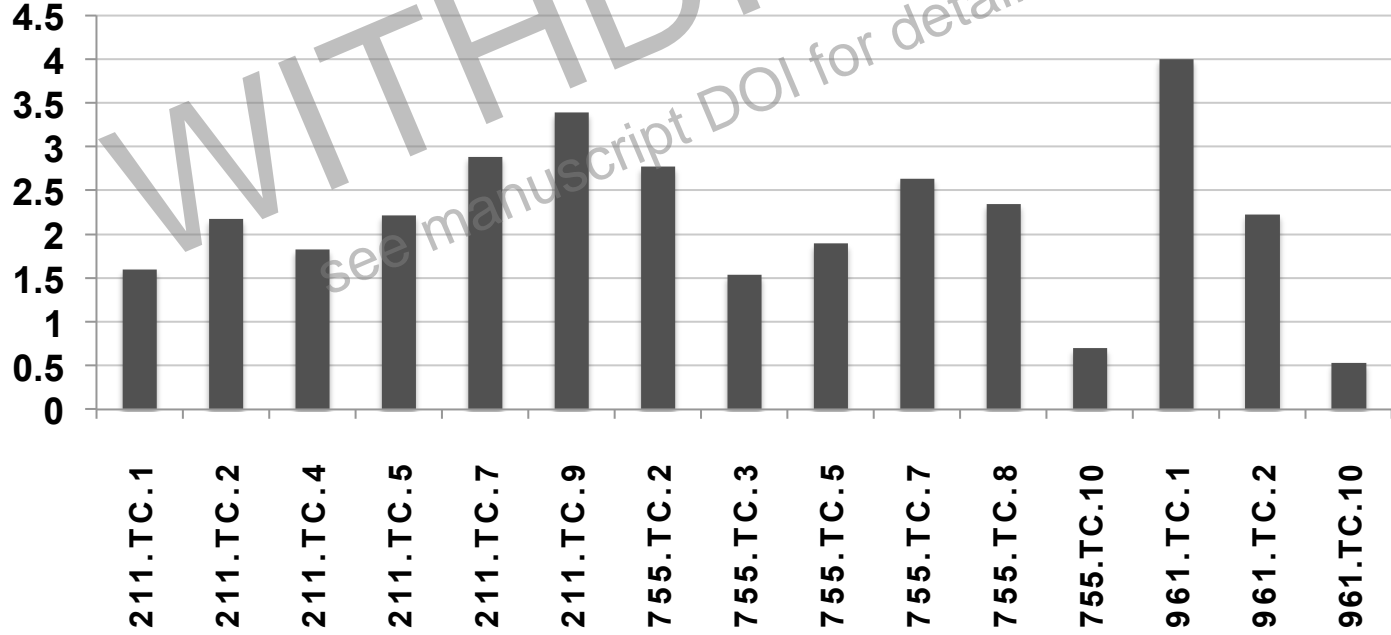

Source: https://www.biorxiv.org/content/10.1101/845974v1.full.pdf
